# Supplementary material for: Air electrode based on poly(3,4-ethylenedioxythiophene) microflower/graphene composite for superior Li–O2batteries with excellent cycle performance
Source: Royal Society of Chemistry journal article supplement (doi:10.1039/c7ra11607a), 2017-01-01
Supplement: c7ra11607a1.pdf [file c7ra11607a1.pdf]

# Supporting Information

**Air electrode based on poly(3,4-ethylenedioxythiophene)  
microflower/graphene composite for superior Li-O<sub>2</sub> batteries with  
excellent cycle performance**

Seon Hye Yoon, Yong Joon Park\*

*Department of Advanced Materials Engineering, Kyonggi University, 154-42,  
Gwanggyosan-Ro, Yeongtong-Gu, Suwon-Si, Gyeonggi-Do, 443-760, Republic of Korea  
Correspond to yjpark2006@kyonggi.ac.kr*

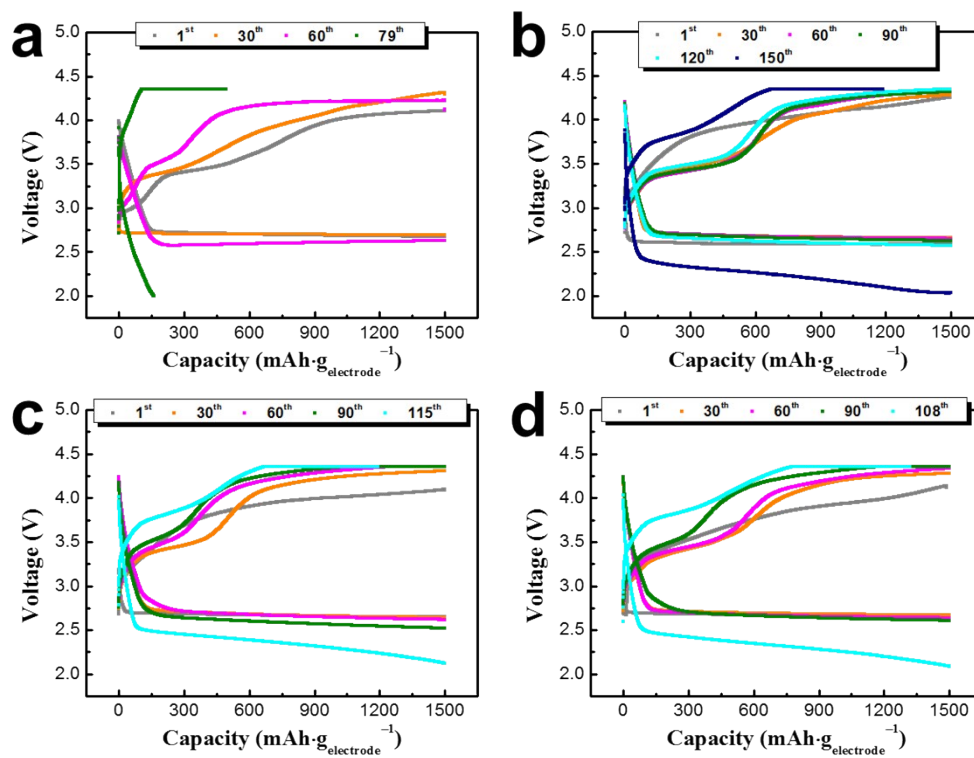

Figure S1. Variations in the discharge-charge profiles of the four different electrodes during cycling at a limited capacity of  $1500 \text{ mAh} \cdot \text{g}_{\text{electrode}}^{-1}$ : (a) graphene electrode, (b) comp-5 electrode, (c) comp-10 electrode, and (d) comp-20 electrode.

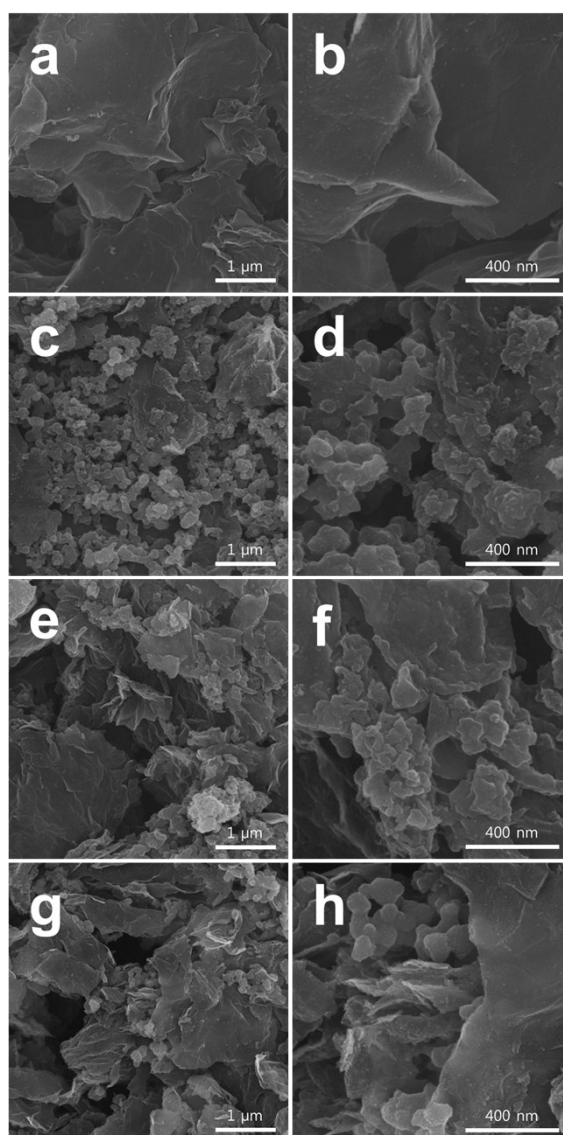

Figure S2. At a limited capacity of  $1500 \text{ mAh} \cdot \text{g}_{\text{electrode}}^{-1}$ , SEM images of the following electrodes after initial discharge: (a, b) graphene electrode, (c, d) comp-5 electrode, (e, f) comp-10 electrode, and (g, h) comp-20 electrode.
